# Supplementary material for: Machine learning of cloud types shows higher climate sensitivity is associated with lower cloud biases
Source: Copernicus journal article supplement (doi:10.5194/acp-2022-184), 2022-03-11
Supplement: Supplementary file [file acp-2022-184-AC1-supplement.pdf]

# Response to Referee 1 on manuscript ‘Machine learning of cloud types shows higher climate sensitivity is associated with lower cloud biases’

Peter Kuma, Frida A.-M. Bender, Alex Schuddeboom, Adrian J. McDonald, and Øyvind Seland

July 22, 2022

Dear Dr. Steven Sherwood,

Thank you for your insightful comments. Please find below our response. In the following text, the original comments are in **bold**, followed by our response. We do not provide a document marking differences between the original and revised manuscripts, because the changes were too substantial for it to make sense.

In the revised manuscript we use a new version of the ANN which performs pixel-wise classification. We hope that this change will address some of the main concerns. We also present a classification for 10 and 27 cloud types, which provides more nuanced results than what would be possible with more traditional cloud classifications. We changed the manuscript title to ‘Machine learning of cloud types in satellite observations and climate models’ to emphasise the new method of cloud classification over of the implications on climate sensitivity.

Kind regards,

Dr. Peter Kuma on behalf of the authors

## General Comments

This paper uses an artificial neural network (ANN) to learn cloud populations (via four cloud types) from top-of-atmosphere LW and SW cloud-radiative effect, demonstrating moderate skill. It then uses this as a metric for comparing climate model cloud fields to observations, by computing RMS error between the satellite-derived and model-derived distributions of the cloud types. This is in principle a very interesting idea, because it provides an arguably more objective way of identifying observational metrics. The authors report a decreasing trend in RMS error with increasing climate sensitivity, which they argue implies that ECS is high in spite of recent assessments finding this to be very unlikely.

In the original manuscript, we present alternative explanations for the relationship between the error and ECS. The more obvious explanation of this is that models with better present-day simulation of clouds are also better with their representation of cloud feedback and therefore ECS, but we do not present this as the only possible explanation. Only the models UKESM/HadGEM and CanESM5 have ECS which is very unlikely in AR6 (above 5 K). Other models which still performed relatively well in our analysis have ECS below 5 K and are still in the very likely range of AR6.

**I believe this work requires major revisions before it should be published, and I’m not sure it should be published at all unless some of these concerns can be satisfactorily overcome (or I have something wrong that just needs explaining better), which hopefully they can. The main problems are elaborated below.**

## Specific Comments

The conclusions drawn are not convincing given the limited number of independent models and the modest strength of relationships seen in Fig. 10. For example if you took out the three MPI models, or the three UKMO models, in either case the correlation would become pretty weak. The authors are using a Cauchy error model which is more forgiving of outliers (of which there are several) than the more common Gaussian model, and as they do not specify otherwise I assume they are taking the models to be independent (which is not a good assumption since, as the authors

**themselves discuss, various models by the same centre often behave similarly). This problem could be addressed if the authors were able to include more models (and I am surprised more cannot be used).**

With the revised ANN the results are strengthened. In the revised manuscript we skip some of the discussion related to ECS and point out the limitation related to the size of the model ensemble more clearly. We perform a sensitivity test in which we remove all closely related models. The results of the test still point to the linear relationship more likely than not for ECS and TCR.

Cauchy distribution is not only more forgiving to outliers, but it is also harder to statistically ‘prove’ a linear relationship vs. no relationship. We think that it is general a better distribution to assume than normal distribution for model ensembles. In model ensembles, the assumption of normally distributed values is unlikely to be appropriate. This is because often configuration or code issues can result in outliers, i.e. there is a relatively small number of factors which can cause large effects and the central limit theorem is unlikely to apply well.

Other model ensemble studies and reviews also often assume model independence, and therefore share this limitation. As stated in the original manuscript, we included all CMIP5 and CMIP6 models which provided the necessary variables and no subjective selection was done.

**Certainly, given that several models disobey the fit, this leaves a reasonable chance that the real world would also disobey the fit, whereas the authors seem to be tacitly assuming in their discussion that the only way ECS could be anything but very high is for the whole relationship to be perversely wrong.**

We disagree with this characterisation of our original manuscript. We do say that based on our results, the more obvious interpretation is that high ECS (high in the context of our model ensemble) is more correct. But we clearly mention the other interpretation and discuss limitations of the evaluation.

In the revised manuscript, fewer models are outliers. The revised ANN produces results which are more clearly related with ECS, TCR and cloud feedback. We also fixed data processing issues with the NorESM2 and CanESM5 models. The only outliers are now only INM, CanESM5 and MRI-ESM2 for ECS and TCR, and also IPSL-CM5A2-INCA for the cloud feedback. It is perhaps likely that the value for cloud feedback of IPSL-CM5A2-INCA (from an external source) is erroneous since it is very far from the other IPSL models (and the highest of all models in the ensemble).

**Having said this I do think it is useful and interesting to show that the more accurate models have higher ECS (although that has been shown by other studies using different metrics), since even if this doesn’t prove ECS is high, it does identify a conundrum that the modeling community needs to solve.**

**Also the authors should be aware of and probably cite papers such as Zhu et al. 2022 doi:10.1029/2021MS002776, who found that the NCAR model could be improved by making a change to the cloud scheme which also reduced the ECS of the model, i.e., a counterexample to the claimed relationship, or Zhao et al. 2016 (10.1175/JCLI-D-15-0191.1) who found that the ECS of the GFDL model could be changed substantially without affecting the latitudinal distribution of cloud radiative effect.**

In the discussion and conclusions, we added: ‘Zhao et al. (2016) showed that it is possible to modify parametrisation of precipitation in convective plumes in the GFDL model and get different Cess sensitivities without increasing CRE error relative to CERES. Zhu et al. (2022) showed that in CESM2, a CMIP6 model with very high ECS of 6.1 K, a physically more consistent cloud microphysics parametrisation reduced the ECS to about 4 K and produced results more consistent with the last glacial maximum.’

**Other authors (Klein, Hall, Caldwell) have pointed out that emergent constraints should be treated with much caution unless there is a mechanism linking the observable to the feedback; simply pointing out that clouds are being observed and are involved in the feedback is not a mechanism.**

Even though we do not use the metric as an emergent constraint, we recognise that it also has this limitation. We point out this limitation in the revised discussion and conclusions.

**Finally, while the authors are entitled to their opinion on how much credibility to give their analysis vs. that of the IPCC and Sherwood et al. (which they should not call an “expert judgment” study since that implies it was based on an expert elicitation rather than an analysis of evidence), I would say it is unfairly dismissive given that those assessments quantitatively incorporated many independent lines of evidence including other emergent constraint studies not dissimilar to this one, for example Volodin et al. which is arguably based on a similar argument and dataset to the current paper (and still has some limited skill — see Schlund et al. 2020). The constraint on ECS offered by**

**the authors is much more indirect and model-dependent than the multiple additional constraints used by the other assessments.**

We do not think that our results invalidate AR6 or Sherwood et al. (2020) for several reasons. Only the HadGEM/UKESM and CanESM5 models in our analyses have ECS above the upper very likely bound of AR6 (5 K), and therefore can be considered inconsistent with AR6. We only use one type metric to evaluate the models, which cannot compete with much more extensive reviews. The method itself has various limitations (as mentioned in the original manuscript). There can also be decoupling between the accuracy of simulation of present-day and future clouds. The conclusions in the original manuscript were already worded carefully for this reason. Some of the conclusions were also based on results presented in the manuscript rather than all available evidence as done in AR6 or Sherwood et al. (2020), as this would be impossible to do fully in a relatively short manuscript whose focus is on introduction of a new evaluation method. The aim is to perform model evaluation which could potentially be considered alongside other evaluation methods in reviews like AR6 or Sherwood et al. (2020). In the revised manuscript, we skip much of the discussion related to low and high ECS models.

We call the review of Sherwood et al. (2020) ‘expert judgment’ because this is how Zelinka et al. (2022) referred to their analysis in the title of their paper and this term is also used in Sherwood et al. (2020). It was not meant to convey any kind of opinion. In the revised manuscript we do not use this term any more.

**I am not convinced that the ANN is behaving as expected. First, the authors have not shown any spatial maps of their verification data to compare with the maps of predicted cloud types. Second, the optical-depth/cloud-height histograms (Fig. 6) don’t make any sense—they show that high clouds have the same distribution as the overall mean, but two different low-cloud types differ in opposite directions. But the high-cloud composite should show more, er, high cloud. I don’t think this can be right.**

In the revised manuscript we present a comparison with maps derived from IDD (Fig. 3, supplementary plots and Section 3.4).

The cloud top pressure-cloud optical depth plots (Fig. 5) show more clear separation between the cloud types with the revised ANN. In Section 3.3, we contrast the results with a classification produced for ISCCP (Rossow and Schiffer, 1991).

**The cloud dataset is not adequately described. Are cloud amounts of each type given in oktas? Or are the clouds seen at each time simply assigned to one of the 27 categories? Or can multiple categories be assigned in a single synoptic observation, i.e., each category assigned a one or zero at each observing time? What exactly is the ANN going to predict? This needs to be given in Section 2.1.4.**

We added the description of IDD in Section 2.2.4. Cloud amounts are not taken into account, only yes/no observation of a cloud genus/species for the three heights (low, middle and high). This is encoded as three numbers denoting the cloud genus/species category (or missing) in every station report. The ANN predicts the probability of positive observation of a given cloud type.

**The way the ANN is employed is also not adequately explained, I’m not sure I fully understand what the authors have done, and what I do think I understand, I mostly had to piece together based on strands in the discussion of results. Also the motivation for the experiment design is not explained — what do we expect this approach to gain that was not gained by all the other efforts to classify or divide cloud scenes into different categories? You need a new section before “Results” where you explain the methodology properly. In 3.1 you don’t say enough. For example you need to explain exactly what the features are and what you are trying to predict (see above comment, we don’t even know the cloud states are represented via numbers). Are you (as I suspect) presenting each ~50x50 grid as single training instances? In which case the output of the ANN is a same-size grid of some measure of cloud state (Predicted cloud type, amount of each cloud type—don’t even know if this is a categorical (classifier) or a real-valued (regression) target variable). Or are you prediction how many grid points will be assigned to each cloud type? Are any other variables used as training features, for example surface temperature (which you said earlier you were using but I don’t see where it comes in)? Or the only predictors are the grid of normalised SW and LW CREs? As I understand it, according to Fig. 1, most of these grid points will have no verification value available, only those observed by an IDD station. I assume you then retain the predictions only at those locations? Help!**

In the revised manuscript we give an additional overview of the method in Section 2.1 and expanded Section 2.3 describing the ANN. Some of the concerns are addressed by pixel-wise classification in the revised ANN and the presentation of results for 10 and 27 cloud types, which go beyond what would be possible with more traditional methods.

If I understand correctly, I don't think the authors are doing this in an optimal way. Based on my inferences, I believe each training instance is a tile of roughly 50x50 grid points; that the features are the gridded maps of SW and LW (normalised) CRE; and that the target variable predicted is the amount of each cloud type in the tile. This means the ANN predicts only four numbers for each tile, thus the authors can make only extremely smooth estimates (e.g. Fig. 4) with no detail at or below the tile dimension. Yet one should be able to predict high, mid and low cloud quite effectively on a local basis just from local SW and LW CRE: high LW CRE means high clouds, high SW and low LW CRE means low clouds; etc. Indeed this is routinely done and is the basis for e.g. the ISCCP cloud classification and other similar ones. It is not clear whether, or how this study has used any of the nominally available spatial information in the tile. If it is not being used then there is no point in starting with tiles, why not use each grid point (where you have a verification datum) as a training instance? If the authors do want to use spatial information (i.e. texture in the cloud field), then I would expect the authors to train on the entire global dataset using a convolutional neural network or other image processing approach that can produce detailed localised predictions rather than only producing populations accumulated over a large region. Or indeed they could use many more (and probably smaller) tiles in a standard NN and predict only the cloud properties at the centre of the tile. This would enable much more incisive testing of both the algorithm and the climate models.

The revised ANN produces 4, 10 and 27 numbers (for a set of 4, 10 and 27 cloud types) for each 2.5° grid cell for samples of 16x16 pixels and 4000x4000 km. The geographical distribution (Fig. 3 and 4 and supplementary plots) now provides much more detailed information. Comparison with the ISCCP cloud classification is in Section 3.3.

I don't find the comparison to traditional classification (Fig. 7) to be useful because of the way the data are being so severely coarse-grained (see point 4). The traditional measures are all local. The comparisons seem to suggest that their classifications have little to do with the traditional ones, which again is highly suspicious since the latter are based on robust physical arguments and should work well at least for high/med/low cloud distinction.

This point should be addressed by the fact that the revised ANN produces much higher resolution output (2.5°, but effective resolution is about 5°). In the revised manuscript, with compare with the cloud top pressure-cloud optical depth classification of Rossow and Schiffer (1991) (Section 3.3) and keep the comparison with SOM-derived classifications (Appendix B). The comparison results show relatively good correspondence with both, but important differences exist.

## Technical suggestions

**Section 2.1.2: I'm surprised that so few models are able to be included, since nearly all will have done the two required experiments, and yet you have fewer than half of the models. I assume that most models did not provide all of the desired radiation variables. Can you specify what was the main thing missing from the other models?**

Many models were missing daily mean outgoing clear sky shortwave or longwave radiation (rsutcs, rlutcs). We included all CMIP5 and CMIP6 models which supplied the required variables.

**Fig. 1: caption states that panels show spectra, but a spectrum is a graph of intensity vs. wavelength. These panels show images not spectra. Also, is the GCM image also from a single day? What day? how was it chosen? It looks fairly close to the observed one so I am guessing you searched somehow for a day that was close—if so this needs to be explained.**

By spectrum we mean the spectrum of the electromagnetic radiation. We replaced the term 'spectrum' with 'radiation' everywhere in the revised manuscript. All GCMs in our dataset are free running, and therefore do not simulate real weather patterns. The day is indicated at the top of the figure: '2010-01-01'. There was no particular reason for choosing this day. It was chosen simply as the first day of a year in the middle of the time period analysed. There was no search for a matching image involved because Fig. 1b and 1c and not to be compared directly – Fig. 1b is real while 1c is a free running model (in the revised manuscript this is Fig. 2).

**158: I don't understand what is being assumed multivariate normal here, or even what the three dimensions are (lon/lat/time?). Why do we assume a normal distribution in time? I would have thought we were just grabbing data from each day, at uniformly (not normally) sampled tile locations.**

The samples were uniformly sampled on a sphere. We used a normal distribution to derive the uniform sampling. One method of how to generate uniformly distributed samples on a sphere is to generate points from a multivariate normal distribution

in Cartesian coordinates, discard distance from the centre and only keep the angles. We skip this description in the revised manuscript because it is not very important beside the fact that that the samples were uniformly distributed.

**159: please also specify that these are TOA upward values**

We did so in the revised manuscript.

**170: please clarify if you discarded these points both for SW and LW training, or only for SW. I don't see any reason to discard them for LW, unless it would make your ML approach inefficient to have unpaired LW values. Clouds in the polar night will have nontrivial LW forcing effects.**

They were discarded if missing values occurred in either SW or LW. The reason for this is because the ANN does not accept missing values and inserting zeros as a replacement could affect the prediction. A workaround could be to train the ANN separately for only the LW channel and join the results, but we did not do this because of time constraints. It is true that this can affect the results at polar latitudes. We try to make this clear in the text.

**Fig. 3: Do I correctly interpret from this figure that the ANN is performing better on the evaluation partition than the training partition of the data? That is not usual. Maybe there is something I am missing here?**

The training and validation datasets have different time coverage and as a result also geographical coverage. In the revised ANN, the validation dataset also has lower loss function (Fig. S1). For a different choice of years for the training and validation datasets, the opposite is true. Some years are missing up to three weeks of data (those years which miss more were excluded), which means their coverage of stations is different. In the revised ANN, the loss function is calculated as the sum of log-likelihood from all pixels in all samples with one or more available stations reports.

**199: when you say "Cloud types in ... reanalyses", I assume you mean the cloud types inferred by running the TOA radiation data through the ANN, not the actual clouds in the reanalysis? Please clarify.**

Yes, that is the case – cloud types inferred by running the TOA radiation data through the ANN.

**201-4: This is not a complete sentence (no verb)**

We reformulated this paragraph to reflect the new results.

**205: I don't think you can dismiss the error that easily. There are strat-cu decks that would not have any other cloud type, and would be large enough to be resolved. I do see them, smoothed out, but to tell if they are fully represented or not we'd need a comparison truth plot.**

The revised ANN can now resolve the strat-cu decks. This is visible in Fig. 3 a4 and in the supplementary plots for 10 and 27 cloud types.

**Fig. 4: Why doesn't this figure include a set of panels for the target (IDD) observations? Only then can we see whether the algorithm is working, no? (see point #2 above)**

We added a row for IDD. The IDD data are only available where there are any stations. We keep only pixels with enough coverage of the whole year. Section 3.2 describes comparison between CERES/ANN and IDD.

**224: wrong citation format**

We corrected this in the revised manuscript.

**Fig. 7: we need to be told what the three rows and five columns represent. No good to just cite a paper we have to go look at to find out. More generally, I am not sure this whole analysis adds much to the paper anyway (see point #6 above).**

We added more description in Section 3.6, so that the analysis can be understood without reading the original papers. We moved the section to an appendix (Appendix B) to de-emphasise it and removed Fig. 8.

**Fig. 8: The caption doesn't fully clarify what is different between the second and third rows. Is the third row the histogram of 5x5 degree averages? The others are histograms at the original scale (1 degree?)**

We removed Fig. 8 because it now does not add much information with pixel-wise classification, which has the same spatial resolution as in the input data.

# Response to Referee 2 on manuscript ‘Machine learning of cloud types shows higher climate sensitivity is associated with lower cloud biases’

Peter Kuma, Frida A.-M. Bender, Alex Schuddeboom, Adrian J. McDonald, and Øyvind Seland

July 22, 2022

Dear anonymous referee,

Thank you for your insightful comments. Please find our response below. In the following text, the original comments are in **bold**, followed by our response. We do not provide a document marking differences between the original and revised manuscripts, because the changes were too substantial for it to make sense.

In the revised manuscript we use a new version of the ANN which performs pixel-wise classification. We hope that this change will address some of the main concerns. We also present a classification for 10 and 27 cloud types, which provides more nuanced results than what would be possible with more traditional cloud classifications. We changed the manuscript title to ‘Machine learning of cloud types in satellite observations and climate models’ to emphasise the new method of cloud classification over of the implications on climate sensitivity.

Kind regards,

Dr. Peter Kuma on behalf of the authors

## Summary

The authors train a supervised deep convolutional artificial neural network to predict the frequency of occurrence of four human-observed cloud types based on the CERES-measured top of atmosphere longwave and shortwave radiation fields over a large 4000 km x 4000 km region. After validating its ability to reproduce the observed cloud types on data withheld during training and comparing their results with an independent cloud categorization analysis, they apply the algorithm to climate model output, thereby allowing them to evaluate the fidelity with which models simulate the various cloud type occurrence frequencies. Model skill in simulating these current-climate cloud occurrences is assessed in light of the model climate sensitivities (ECS and TCR) and cloud feedbacks, and it is found that more sensitive models tend to have smaller mean-state cloud errors, although the cloud feedback shows little relationship with mean-state cloud errors. The authors argue that the most likely explanation for their results is that high ECS is plausible, in contrast to recent expert assessments (Sherwood et al. 2020; Masson-Delmotte et al. 2021) I find the paper’s overall goal to be interesting and worthwhile, but I had substantial difficulty following it in several sections and I believe the authors need to be a little more circumspect with the interpretation of the results. I recommend major revisions, as detailed below.

## Comments

1. I had a very hard time following what was done in setting up, training, and validating the ANN. This includes both understanding it at the conceptual level and in many of the details. I think the authors need to begin Section 2.2 with a “30,000 foot” view of what they are trying to do, namely, predict the frequency of occurrence of 4 WMO cloud types within a 4000 km x 4000 km box based on the (spatial pattern of?) TOA radiative fluxes observed within that box. I think some interpretation of what information the ANN is learning from is needed. Is it the spatial pattern / orientation of SW and LW radiation within the region, the regional-average values, or something else entirely that provides the needed information? Are the SW and LW information equally important or does one band provide most of the information? Why is a deep convolutional artificial neural network needed in the first place; what is it providing that simpler methods would fail to yield? Table 2 and Algorithm 1 are utterly incomprehensible to me, and probably to a majority of readers of this journal. These details should probably go in a supplementary materials or an

appendix, and they should be replaced with something more like schematics that give a sense of the basic workflow, how the ANN is set-up, how the data is split among training and testing, etc. All of these details are hard to extract from the paper.

We added Section 2.1 and Fig. 1 which give a broad overview of the method. The learning is based on spatial information in the samples. Because both SW and LW radiation provide important information about clouds, it can be expected that they are both important for the accuracy of the ANN, even though we could successfully train the ANN on LW radiation only (with worse accuracy). In Section 3.3 in the revised manuscript, we compare the method with a partitioning based on ISCCP (Rossow and Schiffer, 1991). In addition to four cloud types, we provide results for 10 and 27 cloud genera/species, which demonstrate how the method can be useful over more traditional methods. We removed Fig. 2 and Algorithm 1 because they are probably too technical and the same information can be found in the supplied code.

**2. Is it wise to use random selection for splitting the training and testing subsets? I would assume that there could be some autocorrelation in the data that would cause such an approach to overstate the skill relative to a situation in which, say, the (chronologically) first 80% of the data is used as training and the last 20% of the data is used for testing, etc.**

We trained the revised ANN with a validation dataset consisting of years 2007, 2012 and 2017, which were excluded from the training dataset.

**3. What does it mean that the ANN explains 47% of the variance? Variance in what? And where does this number come from; is it in a figure? On line 407, it is stated that this number is “relative to an uninformative predictor” but elsewhere it is not stated relative to anything. How do I interpret this?**

We do not include this type of metric in the revised manuscript. Instead, the ANN is trained using a loss function defined using log-likelihood (Section 2.3) and for validation of the ANN we provide plots of the IDD dataset in Fig. 3, discussed in Section 3.2.

**4. Figures 4 and 5: “Stratiform” is misspelled**

We corrected this in the revised manuscript.

**5. Section 3.3.: How did you calculate these joint histograms? I can’t find any details on how this is done or what data is used in the methods section.**

We added Section 2.4 explaining how these histograms were produced.

**6. Section 3.4: I am completely lost in this section on comparing to MODIS and ISCCP cloud clusters. How is the ANN now being generated on a 5x5 degree grid when previously the highest resolution is 4000 km x 4000 km? What exactly are you showing in Figure 7? I assume the reader has to be familiar with Schuddeboom et al. (2018) and McDonald and Parsons (2018) to understand this, but how many readers will be? I read this several times and I simply cannot wrap my head around what is being done here, other than a vague sanity check that what the ANN calls “high”, “stratiform”, etc. is consistent with independent cloud clustering methods. I recommend a complete re-write of this section keeping in mind that the average reader is not familiar with these other studies.**

We rewrote this section to better explain the comparison and give enough context to understand the comparison without reading the referenced papers.

With the original ANN, even though the samples were 4000x4000 km, geographical distribution on 5x5° grid was produced by counting the contribution of every overlying sample to a grid cell. However, the effective resolution was much lower.

With the revised ANN, the classification is done on a 2.5x2.5° grid, but the effective resolution is about 5°.

The figure shows cloud clusters generated using SOM in the referenced papers, and how they co-occur with the ANN cloud types. In the revised manuscript we give a more detailed explanation in the caption and also specify cluster numbers in the plots.

**7. Section 3.5: I do not see any justification for regressing the observed cloud types on global mean surface temperature during the brief CERES record that (1) it is likely dominated by internal variability that is not directly relevant to the long-term cloud feedback and (2) likely includes effects related to changes in aerosols and other non-CO2 forcings. Placing these results side-by-side with the abrupt-4xCO2 cloud changes is misleading and not a robust evaluation of models. You already note that this is not a “reliable observational reference”, so I wonder why you did it.**

We do not include CERES in the revised figure for abrupt-4xCO<sub>2</sub>. It was included in the original figure because within the error bars it was still possible to tell if a particular cloud type was increasing or decreasing during the instrumental record of CERES.

**A more minor point: the abrupt-4xCO<sub>2</sub> simulation does not occur during a particular time in the historical record (noted here as 1850-1949) but rather to an arbitrary 150-year period whenever the modeling center decided to branch from its piControl simulation. So I think you meant to say simply that you used data from the 150-year experiment.**

We clarified this in the revised manuscript.

**8. Bayes factors: Maybe I am just ignorant, but this is the first time I had ever seen these numbers for significance testing. Perhaps other readers will also be clueless about what these numbers mean. Please provide some brief explanation when these first appear in the text, and discuss in more detail their meaning in the appendix.**

In the revised manuscript, we specify probability of the null hypothesis instead of Bayes factor, also calculated using Bayesian model comparison.

**9. Lines 321-323: The choice to report the ECS values for RMSE values below an arbitrary threshold (2.4%) is a little egregious, given that if the threshold for what is considered “low” RMSE is relaxed only slightly (to say 5%), the entire range of ECS values is now supported. Ditto for the “high” RMSE values: If you take all models with higher-than-average or even probably the models in the top 10 percentile of RMSE, you will include the high-ECS CanESM5 model.**

With the revised ANN, all models with ECS greater than 4 K have RMSE below 3% (a group 9 models of 18). All but three models with ECS lower than 4 K have RMSE above 3% (a group 9 models of 18). In the revised manuscript we fixed a technical issue with processing of CanESM5 and NorESM2 data. As a result, they are much more consistent with the rest of the models.

**10. Figure 10b: I wonder how large the Bayes factor would be if models from the same modeling center were averaged together before computing significance. Would the relationships derived in the paper between cloud occurrence RMSE and ECS remain so strong once the 3 UKMO models, 2 CNRM models, 2 INMCM models, 3 IPSL models, and 3 MPI models are combined? This would represent a substantial decrease in sample size from 18 to 10.**

We performed a sensitivity test with only 10 models as suggested. The null hypothesis model (no linear relationship) probability remains less likely than the alternative model for ECS and TCR, but not cloud feedback, with  $P(M_0) = 0.29, 0.29, 0.62$  respectively. We included this information in Section 3.5 in the revised manuscript.

**11. Lines 337-340: I find this reasoning for why simulating good mean-state clouds should translate to simulating good clouds in a future warmed state to be dubious. It is likely that clouds will inhabit an environment with different conditions in the future (e.g., one with higher SSTs, stronger inversions, and a sharper moisture contrast between the boundary layer and free-troposphere) – refer to the cloud controlling factor literature (Bretherton 2015; Klein et al. 2017).**

We skipped this part of discussion in the revised manuscript.

**12. Line 347: “lower ECS” is a little misleading, as I think you mean lower than the highest ECS values in CMIP models, but not lower than, say, the canonical IPCC range.**

We now explicitly specify low ECS as  $< 4$  K and high ECS as  $> 4$  K (in the context of our model ensemble) everywhere in the text.

**13. Lines 353-354: In my opinion the simplest / most likely explanation is neither of these, but rather that you are looking at a very small sample size of models (especially once you combine closely related models from the same center) and spurious correlations can occur. Perhaps more importantly, I am led to doubt the robustness of the correlation with ECS because the correlation with cloud feedback is poor (Figure 10d). How are we to believe that accurately simulating mean-state clouds translates to a better representation of ECS if the most obvious intermediary (cloud feedback) shows no relationship with mean-state cloud quality?**

In our new results the statistical relationship was strengthened ( $P(M_0) = 2 \times 10^{-3}, 9 \times 10^{-3}$  and  $1 \times 10^{-2}$ ) for ECS, TCR and cloud feedback due to improvements in the ANN. In the revised manuscript we include results from the sensitivity test with a smaller set of unrelated models and we mention this limitation in the discussion and conclusions.



Including all available models in an ensemble is a relatively common practice (e.g. with emergent constraints in Schlund et al., 2020, but also in various multi-model statistics in AR6) as well as using perturbations of a single model. CMIP5 and CMIP6 models are all generally highly code-dependent because of historical code sharing within and between modeling centres, and this impacts many model ensemble studies.

We reformulated the discussion, conclusions and abstract in a way that makes it more clear that this limitation exists.

**14. Lines 400-404: I don't understand what is being suggested here or how it could be used in concert with the techniques employed in this study.**

We changed this to: 'Potentially, other satellite products which provide TOA radiance information could be used instead of CERES, such as ISCCP, Multi-angle Imaging SpectroRadiometer (MISR), MODIS, CloudSat or the Cloud-Aerosol Lidar and Infrared Pathfinder Satellite Observation (CALIPSO). Because an equivalent physical quantity needs to be provided from a model for the ANN to be applicable on both, a satellite simulator such as the Cloud Feedback Model Intercomparison Project (CFMIP) Observation Simulator Package (COSP) could be used to calculate such an equivalent quantity from the model output.'

**15. Lines 432-435: My read of Zelinka et al (2022) is that the quality of present-day cloud representation has very little bearing on the quality of its cloud feedback (see their Figure 4b). Seems worth mentioning this, rather than the weaker statement that it is an open question.**

In their Fig. 4a, they show that it is related to cloud feedback. Their Fig. 4b shows little relation to cloud feedback RMSE (with respect to cloud feedback as assessed by Sherwood et al., 2020). Therefore, they show a similar result as us in their Fig. 4a, compared with our Fig. 9d in the revised manuscript. In the revised manuscript, we added: 'They call this an open question for future research, although they note that "model parameters driving variance in mean-state extratropical cloud-radiative effect across members of the HadGEM3-GA7.05 perturbed physics ensemble differ from those driving the variance in its cloud feedback (Tsushima et al., 2020)."'

**16. Lines 435-440: Somewhere around here it may bear mentioning the notion that emergent constraints based on mean-state climatological observables (like the occurrence frequency of the 4 cloud types in this study) are generally less useful or robust than those that narrow in on processes relevant to the climate change phenomenon of interest (Klein and Hall 2015; Hall et al. 2019)**

In the discussion and conclusions we add: 'We suggest that our results about high sensitivity models being more correct in their cloud type representation should be considered with caution due to the novelty of the method, the size and cross-correlations in the model ensemble and need for a physical explanation.'

With the revised ANN we show that in the abrupt-4xCO<sub>2</sub> experiment, low ECS (< 4 K) models tend to simulate increasing stratiform clouds and decreasing cumuliform clouds, while high ECS (> 4 K) models tend to simulate the opposite (Fig. 6b). Due to the lower optical depth of cumuliform clouds, this may be a physical reason partly responsible for the difference between the low and high ECS models.
